# Supplementary material for: The Assessment of Dietary Organic Zinc on Zinc Homeostasis, Antioxidant Capacity, Immune Response, Glycolysis and Intestinal Microbiota in White Shrimp (Litopenaeus vannamei Boone, 1931)
Source: MDPI journal article supplement (doi:10.3390/antiox11081492), 2022-07-29
Supplement: s1 [file s1]

# Supplementary Materials: The Assessment of Dietary Organic Zinc on Zinc Homeostasis, Antioxidant Capacity, Immune Response, Glycolysis and Intestinal Microbiota in White Shrimp (*Litopenaeus vannamei* Boone, 1931)

Jin Zhu Yang <sup>1</sup>, Tian Tian Wang <sup>1</sup>, Gang Lin <sup>2</sup>, Ming Zhu Li <sup>3</sup>, Yan Jiao Zhang <sup>1,\*</sup> and Kang Sen Mai <sup>1</sup>

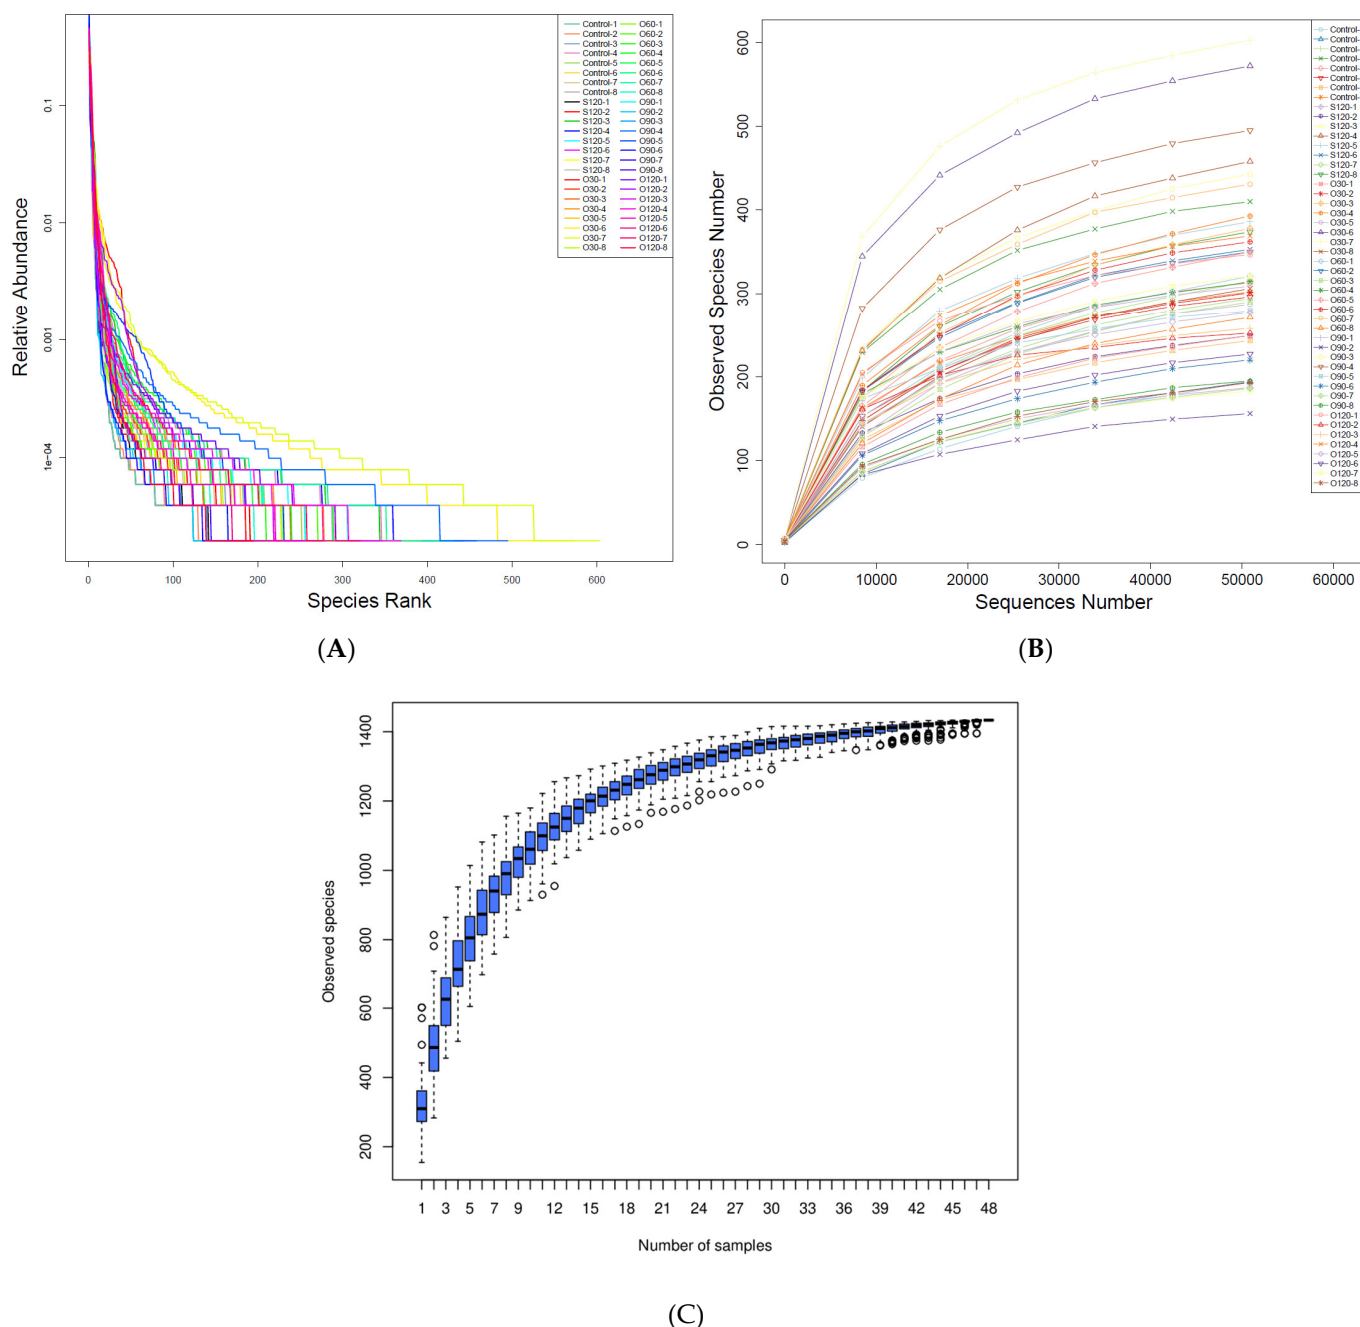

**Figure S1.** Rank abundance (A), Rarefaction curves (B) and Species accumulation boxplot (C) for all the intestinal microbiota samples.

**Table S1.** Primers used in qPCR and amplification information.

| Genes    | Primer sequence (5'-3') |                        | T <sub>m</sub> (°C) | Product length | Amplification efficiency | GenBank Accession no. |
|----------|-------------------------|------------------------|---------------------|----------------|--------------------------|-----------------------|
|          | Forward                 | Reverse                |                     |                |                          |                       |
| β-Actin  | CGAGAGGAAGCAGCACGTA     | GACGATGGAGGGGAACACAG   | 60                  | 164            | 1.01                     | AF300705.2            |
| EF1α     | TCGCCTTCTATCATCCCCATC   | GATGTTGTCCAGGGCATCGAAC | 60                  | 147            | 1.08                     | JF288785.1            |
| 18S rRNA | CTGCGAAAGCATCTGCCAAG    | GGATCGCTAGTCAGCATCGT   | 60                  | 113            | 0.94                     | AF186250.1            |
| CAT      | TAAGGGAGCAGGTGCCTTTG    | ATCCCTGGCAGTGTCTAGTTG  | 60                  | 157            | 1.00                     | AY518322.1            |
| G6PDH    | ACATCGCCTCGGTCTTCATC    | GAATCGTCAAGTAGCCGC     | 60                  | 74             | 1.06                     | MK814533.1            |
| Gpx      | GGCACCAGGAGAACACTACC    | TCGAAGTTGTTCCAGGACG    | 60                  | 73             | 1.03                     | AY973252.2            |
| GST      | GAATGCTGCCCCTTTAGGC     | CCGAGTTTGAACTTGACGGC   | 60                  | 163            | 1.06                     | AY573381.2            |
| SOD      | ACGTAAGCGCAATGAATGCC    | GAAGCCATGTTGGGTCCAGA   | 60                  | 93             | 1.09                     | AB108065.1            |
| ACP      | AAGCCTGAAGTTCGTGCTGA    | TGACTCTGGTGCAGTCATCG   | 60                  | 97             | 1.03                     | KR676449.1            |
| AKP      | GCGAGACGACAACGGATTC     | CAGCGGTGACGATGATAAGAG  | 60                  | 170            | 1.11                     | KR534873.1            |
| Hemo     | AGACTGGGCATCCTTTGTCG    | TCATAGAGGGGAGGGAGCAC   | 60                  | 135            | 1.06                     | MK896907.1            |
| LZM      | GGTGCGCCGAGACTATCC      | TTGCTGTTGTAAGCCACCCA   | 60                  | 85             | 1.07                     | AY170126.2            |
| ProPO    | GAATCCATTCCGTCCGTCTG    | GGCTTCGCTCTGGTTAGGAT   | 60                  | 123            | 1.05                     | AY723296.1            |
| Glut1    | CTACTCGCATGCTTCTGGGT    | GTCGCGCTTCTCCTCTAGGT   | 60                  | 150            | 1.00                     | KM201335.1            |
| MT       | CCCATCCAAGGAGGAGTG TG   | AGCAGCAGAAGACAGTCGAG   | 60                  | 88             | 1.03                     | JN707684.1            |
| ZnT1     | TTCCAGGAGCCTCAAAGCAG    | GTAGAGCGCTATGGTTCCCC   | 60                  | 148            | 0.97                     | QCY01003491.1         |
| ZIP11    | CGGAAGGCATGGCAGTTAGT    | GCTCCCAGAACACCTGCTAC   | 60                  | 115            | 1.05                     | XM_027361504.1        |

Abbreviations: EF1α, elongation factor 1-alpha; 18S rRNA, 18S ribosomal RNA; CAT, catalase; G6PDH, glucose-6-phosphate dehydrogenase; Gpx, glutathione peroxidase; GST, glutathione S-transferase; SOD, superoxide dismutase; ACP, acid phosphatase; AKP, alkaline phosphatase; Hemo, hemocyanin; LZM: lysozyme; ProPO, pro-phenoloxidase; Glut1, glucose transporter 1; MT, metallothionein; ZnT1, zinc transporter 1; ZIP11, Zrt-/Irt-like protein 11.

Table S2 description was gain from Excel based tool BestKeeper [1]. Briefly, all cycle quantification (Cq) values of 3 candidate housekeeping genes were inputted in the BestKeeper on Excel table. The main calculation results were obtained as shown in Table S2. Any gene with the std dev [ $\pm$  Cq] value lower than 1.00 was considered stably expressed. Furthermore, based on the std dev [ $\pm$  Cq] value and CV [% Cq] value, any gene with the lowest value was considered the most stably expressed, which meant that  $\beta$ -actin was the best housekeeping gene in the present experiment.

Table S3 description was gain from Excel add-in "NormFinder.xla" [2]. Briefly, all cycle quantification (Cq) values of 3 candidate housekeeping genes were inputted in Excel table. After edited the gene name and group catalog, "NormFinder" from Excel add-ins was selected. Then all relative data were selected using the dialog box. Finally, the main output data were shown in Table S3. By comparing the stability values of 3 candidate housekeeping genes, any gene with the lowest value was considered the most stably expressed, which meant that  $\beta$ -actin was the best housekeeping gene in the present experiment.

Finally,  $\beta$ -actin was assessed as the best housekeeping gene in the present experiment.

**Table S2.** Descriptive statistics of 3 candidate housekeeping genes (HKG) based on their cycle quantification (Cq) values.

| Factor                  | $\beta$ -Actin | EF1 $\alpha$ | 18S rRNA |
|-------------------------|----------------|--------------|----------|
| GM [Cq]                 | 17.01          | 23.15        | 9.57     |
| AM [Cq]                 | 17.02          | 23.19        | 9.58     |
| Min [Cq]                | 16.52          | 20.69        | 8.40     |
| Max [CP]                | 17.50          | 25.67        | 10.26    |
| std dev [ $\pm$ Cq]     | 0.25           | 1.15         | 0.38     |
| CV [% Cq]               | 1.46           | 4.97         | 3.95     |
| Min [x-fold]            | -1.41          | -6.09        | -2.17    |
| Max [x-fold]            | 1.40           | 6.34         | 1.58     |
| std dev [ $\pm$ x-fold] | 1.19           | 2.24         | 1.30     |

Abbreviations: GM [Cq]: the geometric mean of Cq; AM [Cq]: the arithmetic mean of Cq; Min [Cq] and Max [Cq]: the extreme values of Cq; std dev [ $\pm$  Cq]: the standard deviation of the Cq; CV [% Cq]: the coefficient of variance expressed as a percentage on the Cq level; Min [x-fold] and Max [x-fold]: the extreme values of expression levels expressed as an absolute x-fold over- or under-regulation coefficient; std dev [ $\pm$  x-fold]: standard deviation of the absolute regulation coefficient.

**Table S3.** Stability analysis of 3 candidate HKG based on their Cq values.

| Gene name       | $\beta$ -actin | EF1 $\alpha$ | 18S rRNA |
|-----------------|----------------|--------------|----------|
| Stability value | 0.312          | 0.649        | 0.445    |
| Best HKG        | $\beta$ -actin |              |          |

## Reference

1. Pfaffl, M.W.; Tichopad, A.; Prgomet, C.; Neuvians, T.P. Determination of Stable Housekeeping Genes, Differentially Regulated Target Genes and Sample Integrity: BestKeeper--Excel-Based Tool Using Pair-Wise Correlations. *Biotechnol. Lett.* **2004**, *26*, 509–515.
2. Andersen, C.L.; Jensen, J.L.; Ørntoft, T.F. Normalization of Real-Time Quantitative Reverse Transcription-PCR Data: A Model-Based Variance Estimation Approach to Identify Genes Suited for Normalization, Applied to Bladder and Colon Cancer Data Sets. *Cancer Res.* **2004**, *64*, 5245–5250.

**Table S4.** Amova analysis based on Unweighted Unifrac distance of microbial community structure of *Litopenaeus vannamei* Boone, 1931.

| Groups       | P       |
|--------------|---------|
| Control-S120 | <0.001* |
| Control-O30  | <0.001* |
| Control-O60  | <0.001* |
| Control-O90  | <0.001* |
| Control-O120 | <0.001* |
| S120-O30     | <0.001* |
| S120-O60     | <0.001* |
| S120-O90     | <0.001* |
| S120-O120    | <0.001* |
| O30-O60      | <0.001* |
| O30-O90      | <0.001* |
| O30-O120     | <0.001* |
| O60-O90      | <0.001* |
| O60-O120     | <0.001* |
| O90-O120     | 0.048*  |

P value smaller than 0.05 indicated the difference between two groups was significant.

**Table S5.** The genus level classification information of MetaStat analysis showed in Figure 6.

| Phylum            | Class               | Order               | Family             | Genus                  | Location  |
|-------------------|---------------------|---------------------|--------------------|------------------------|-----------|
| Actinobacteriota  | Actinobacteria      | Micrococcales       | Micrococcaceae     | <i>Kocuria</i>         | Figure 6A |
| Actinobacteriota  | Actinobacteria      | Micrococcales       | Micrococcaceae     | <i>Arthrobacter</i>    | Figure 6A |
| Actinobacteriota  | Actinobacteria      | Bifidobacteriales   | Bifidobacteriaceae | <i>Bifidobacterium</i> | Figure 6A |
| Proteobacteria    | Alphaproteobacteria | Sphingomonadales    | Sphingomonadaceae  | <i>Sphingomonas</i>    | Figure 6A |
| Proteobacteria    | Gammaproteobacteria | Alteromonadales     | Alteromonadaceae   | <i>Alteromonas</i>     | Figure 6A |
| Firmicutes        | Bacilli             | Bacillales          | Bacillaceae        | <i>Bacillus</i>        | Figure 6B |
| Firmicutes        | Bacilli             | Lactobacillales     | Leuconostocaceae   | <i>Weissella</i>       | Figure 6B |
| Firmicutes        | Bacilli             | Paenibacillales     | Paenibacillaceae   | <i>Paenibacillus</i>   | Figure 6B |
| Proteobacteria    | Gammaproteobacteria | Pseudomonadales     | Pseudomonadaceae   | <i>Pseudomonas</i>     | Figure 6B |
| Verrucomicrobiota | Verrucomicrobiae    | Verrucomicrobiales  | Akkermansiaceae    | <i>Akkermansia</i>     | Figure 6B |
| Actinobacteriota  | Actinobacteria      | Micrococcales       | Brevibacteriaceae  | <i>Brevibacterium</i>  | Figure 6C |
| Firmicutes        | Bacilli             | Lactobacillales     | Vagococcaceae      | <i>Vagococcus</i>      | Figure 6C |
| Firmicutes        | Bacilli             | Lactobacillales     | Aerococcaceae      | <i>Aerococcus</i>      | Figure 6C |
| Firmicutes        | Clostridia          | Lachnospirales      | Lachnospiraceae    | <i>Lachnospira</i>     | Figure 6C |
| Firmicutes        | Clostridia          | Lachnospirales      | Lachnospiraceae    | <i>Butyrivibrio</i>    | Figure 6C |
| Firmicutes        | Clostridia          | Oscillospirales     | Ruminococcaceae    | <i>Subdoligranulum</i> | Figure 6C |
| Fusobacteriota    | Fusobacteriia       | Fusobacteriales     | Fusobacteriaceae   | <i>Propionigenium</i>  | Figure 6C |
| Actinobacteriota  | Actinobacteria      | Propionibacteriales | Nocardioideaceae   | <i>Aeromicrobium</i>   | Figure 6D |
| Actinobacteriota  | Actinobacteria      | Pseudonocardiales   | Pseudonocardiaceae | <i>Pseudonocardia</i>  | Figure 6D |
| Proteobacteria    | Gammaproteobacteria | Xanthomonadales     | Xanthomonadaceae   | <i>Thermomonas</i>     | Figure 6D |
| Proteobacteria    | Gammaproteobacteria | Xanthomonadales     | Xanthomonadaceae   | <i>Lysobacter</i>      | Figure 6D |
| Actinobacteriota  | Actinobacteria      | Corynebacteriales   | Corynebacteriaceae | <i>Corynebacterium</i> | Figure 6E |
| Bacteroidota      | Bacteroidia         | Flavobacteriales    | Flavobacteriaceae  | <i>Aquimarina</i>      | Figure 6E |

|                  |                             |                                     |                       |                               |           |
|------------------|-----------------------------|-------------------------------------|-----------------------|-------------------------------|-----------|
| Bacteroidota     | Bacteroidia                 | Flavobacteriales                    | Flavobacteriaceae     | <i>Flavobacterium</i>         | Figure 6E |
| Bacteroidota     | Bacteroidia                 | Flavobacteriales                    | Flavobacteriaceae     | <i>Tenacibaculum</i>          | Figure 6E |
| Campilobacterota | Campylobacteria             | Campylobacterales                   | Sulfurovaceae         | <i>Sulfurovum</i>             | Figure 6E |
| Firmicutes       | Clostridia                  | Peptostreptococcales-Tissierellales | Peptostreptococcaceae | <i>Paeniclostridium</i>       | Figure 6E |
| Spirochaetota    | Spirochaetia                | Spirochaetales                      | Spirochaetaceae       | <i>Sphaerochaeta</i>          | Figure 6E |
| Proteobacteria   | Alphaproteobacteria         | Acetobacterales                     | Acetobacteraceae      | <i>Roseomonas</i>             | Figure 6F |
| Proteobacteria   | Gammaproteobacteria         | Pasteurellales                      | Pasteurellaceae       | <i>Haemophilus</i>            | Figure 6F |
| Proteobacteria   | Gammaproteobacteria         | Enterobacteriales                   | Enterobacteriaceae    | <i>Raoultella</i>             | Figure 6F |
| Proteobacteria   | Gammaproteobacteria         | Enterobacteriales                   | Enterobacteriaceae    | <i>Escherichia-Shigella</i>   | Figure 6F |
| Proteobacteria   | Gammaproteobacteria         | Xanthomonadales                     | Xanthomonadaceae      | <i>Stenotrophomonas</i>       | Figure 6F |
| Proteobacteria   | Gammaproteobacteria         | Thiotrichales                       | Thiotrichaceae        | <i>Leucothrix</i>             | Figure 6F |
| Planctomycetes   | unidentified_Planctomycetes | Pirellulales                        | Pirellulaceae         | <i>Bythopirellula</i>         | Figure 6G |
| Planctomycetes   | unidentified_Planctomycetes | Pirellulales                        | Pirellulaceae         | <i>Rubripirellula</i>         | Figure 6G |
| Planctomycetes   | unidentified_Planctomycetes | Pirellulales                        | Pirellulaceae         | <i>Blastopirellula</i>        | Figure 6G |
| Planctomycetes   | unidentified_Planctomycetes | Pirellulales                        | Pirellulaceae         | <i>Pirellula</i>              | Figure 6G |
| Planctomycetes   | unidentified_Planctomycetes | Planctomycetales                    | Rubinisphaeraceae     | <i>Planctomicrobium</i>       | Figure 6G |
| Desulfobacterota | Desulfovibrionia            | Desulfovibrionales                  | Desulfovibrionaceae   | <i>Desulfovibrio</i>          | Figure 6H |
| Desulfobacterota | Desulfobacteria             | Desulfobacterales                   | Desulfosarcinaceae    | <i>Sva0081_sediment_group</i> | Figure 6H |
| Desulfobacterota | Desulfobacteria             | Desulfobacterales                   | Desulfosarcinaceae    | <i>Desulfosarcina</i>         | Figure 6H |

**Table S6.** The genera abundance changes of *L. vannamei* based on MetaStat analysis

↑ or ↓ means the abundance was significantly increased or decreased when compared with Control, S120 and O60 groups; number in the cells indicates the number of significantly changed genera.

| A-D | vs Control |     |      | vs S120 |      | vs O60 |
|-----|------------|-----|------|---------|------|--------|
|     | S120       | O60 | O120 | O60     | O120 | O120   |
| ↑   | 3          | 13  | 16   | 9       | 16   | 4      |
| ↓   | 0          | 1   | 0    | 1       | 0    | 1      |
| E-H | S120       | O60 | O120 | O60     | O120 | O120   |
|     | S120       | O60 | O120 | O60     | O120 | O120   |
| ↑   | 3          | 1   | 0    | 0       | 3    | 0      |
| ↓   | 1          | 3   | 4    | 6       | 16   | 1      |
